# Supplementary material for: The effect of chondroitin sulfate concentration and matrix stiffness on chondrogenic differentiation of mesenchymal stem cells
Source: Royal Society of Chemistry journal article supplement (doi:10.1039/d2bm01980a), 2023-01-01
Supplement: d2bm01980a1.pdf [file d2bm01980a1.pdf]

## Supplementary Figures

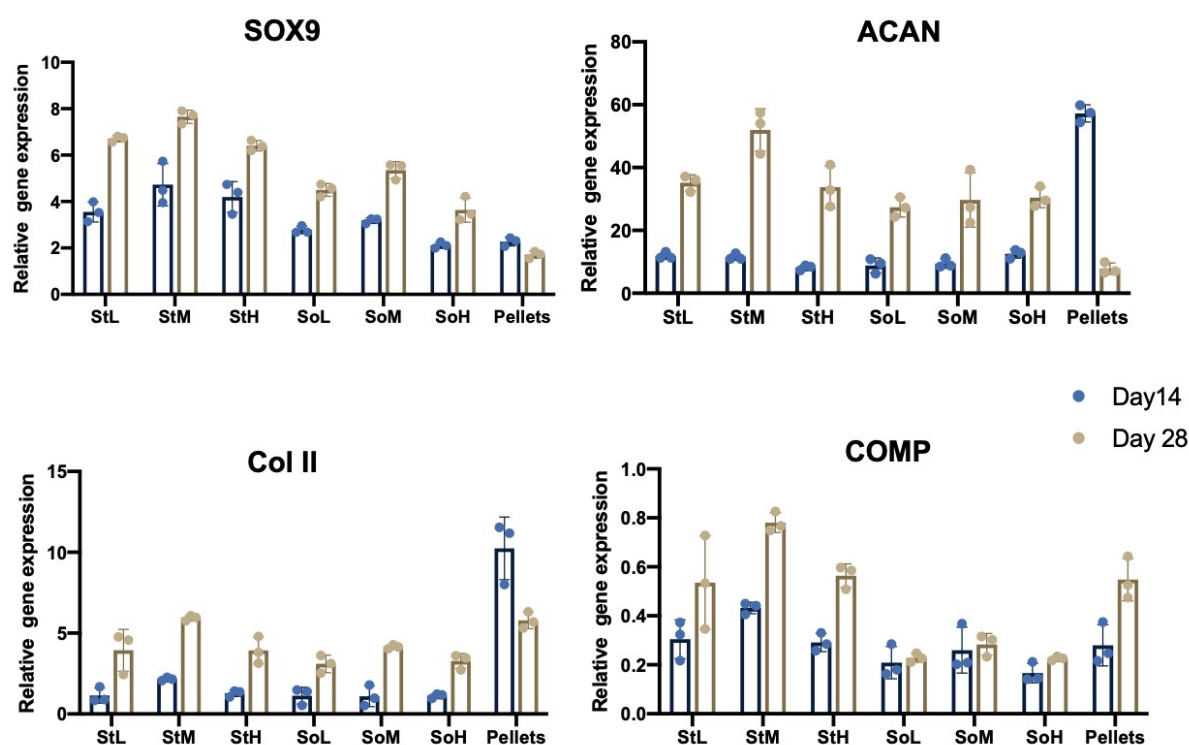

Supplementary Figure 1. Chondrogenic gene expression in hydrogels and pellets.

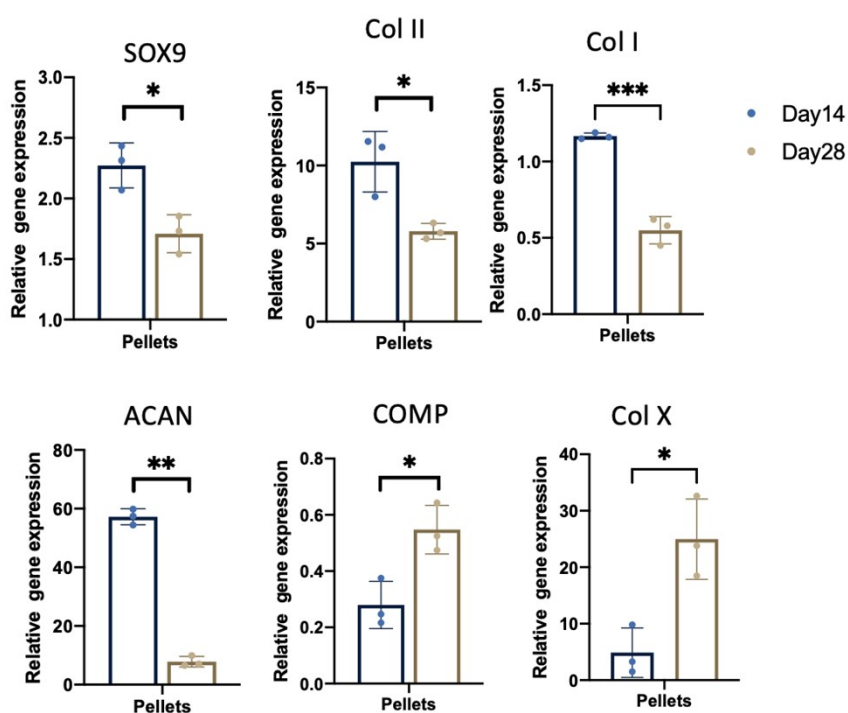

Supplementary Figure 2. Gene expression analysis in pellets. The expression on day 14 and day 28 was compared by Student's t-test. \*p<0.05, \*\*p<0.01, \*\*\*p<0.001.

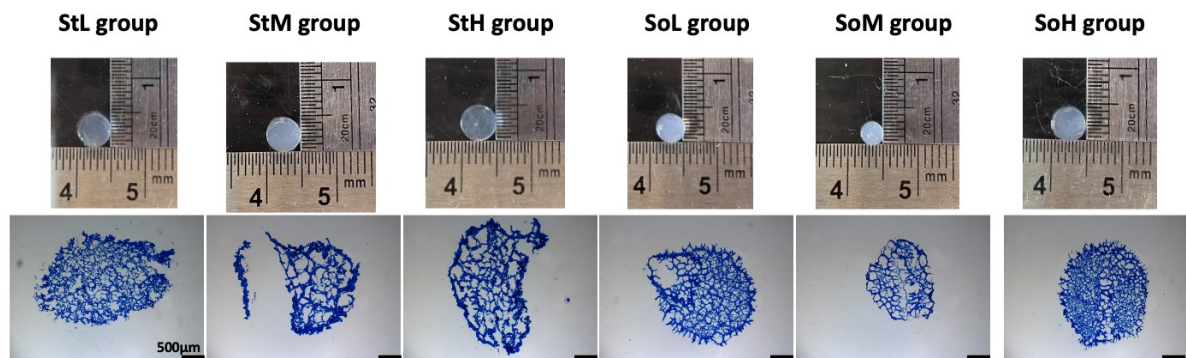

Supplementary Figure 3. The gross observation and Alcian blue staining of cell laden hydrogels after 28- day culture in chondrogenic medium.

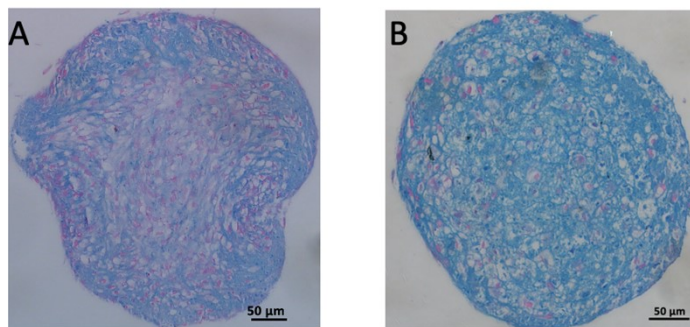

Supplementary Figure 4. Alcian blue staining of chondrogenic pellets after 14 days (A) and 28 days (B).
